# Supplementary material
Source: publisher figshare collection journal article supplement (https://frontiersin.figshare.com/ndownloader/files/28958307)
Supplement: Supplementary file 1 [file 28958307]

Supplementary Material

# Meso-scale data collection in the Argentina Creek

In 2015 a field campaign was carried out in the Argentina Creek (UTM 32N E: 406391.00 m; UTM 32N N:4865963.25 m, NW Italy) to assess the environmental impact of a run-of-river hydropower plant through the MesoHABSIM methodology. From this data collection campaign two geomorphic unit (GU or mesohabitat) surveys were used in this study to show the output of the conditional habitat suitability models developed for adult and juvenile *Telestes muticellus*. These river surveys were performed at 0.25 m3/s and 2.2 m3/s, which correspond to typically low (90-percentile of flow duration curve) and medium (25-percentile of flow duration curve) discharge conditions of the Argentina Creek. Together with the river survey at the lowest flow condition (0.25 m3/s), a quantitative fish data collection was performed at the mesohabitat scale to describe fish species distribution (presence/absence).

GUs and fish data collection was carried out following the MesoHABSIM protocols and standards (Vezza et al., 2014b; 2017). In particular, by using the multi-scale characterization procedure proposed by Gurnell et al. (2014) and Belletti et al. (2017), it was possible to identify a morphologically homogeneous reach downstream the hydropower plant. A study site (sub-reach) was then selected and the GUs description was based on a mobile mapping technique defined in Vezza et al. (2014b, 2017). This technique is based on the use of a rangefinder (TruPulse360B, Laser Technology, Inc.), a rugged PC (Nomad TDS, Field Environmental Instruments,Inc.) and a geographic information system (GIS) software to properly record the GUs with all their habitat attributes (see Table S2, Vezza et al 2014b). In particular, by walking downstream, the GU areas were delineated and stored in a GIS environment, and the mesohabitat-scale features (GU type, GU longitudinal connectivity, GU gradient, cover, shores characteristics) were recorded. Coming back upstream, depth and velocity values were measured using a flow meter (Marsh McBirney Flo-Mate 2000) and substrate composition were assessed from each of the mapped mesohabitats (Vezza et al., 2014b). Finally, flow measurements were performed at the beginning and the end of each survey. The two river surveys permitted to outlined 46 GUs, 37 GUs at 0.25 m3/s and 19 GUs at 2.2 m3/s.

Fish data were collected by sampling 20 GUs within the study site with backpack electrofishing (i.e., two-pass removal method, Meador et al., 2003) at the lowest flow condition (0.25 m3/s). To ensure the direct association between sampled GUs and the captured fish species, each mesohabitat was kept separated by using nets (Vezza et al., 2014a). Collected fish were measured in terms of total length (TL) and successively released within the same sampled mesohabitat. In total, 424 fish were captured, most of which were Italian vairone (*Telestes muticellus*, 317), classified as adult or juvenile according to the length/age relationships reported in Vezza et al. (2012).

It is important to highlight that the application of the MesoHABSIM methodology for the Argentina Creek included the calculation of the spatio-temporal variation in habitat availability at the reach-scale, following the methodology for high gradient streams reported in Vezza et al. (2014b, 2017). For the sake of brevity, the comprehensive explanation of all the methodological steps is not reported in this Supplementary Material.

# Supplementary Tables

**Table S1.** Search strings used for the database screening. All possible combinations of species’ scientific/common names both in English and Italian language and the following habitat-related statements were used.

| **Species’ scientific/common names** |  | **Habitat-related statements** |
| --- | --- | --- |
| species scientific name (e.g., *Anguilla anguilla*) | + | habitat preferences |
| species common name in English (e.g., eel) | + | habitat use |
| species common name in Italian (e.g., anguilla) | + | habitat selection |
|  | + | habitat requirements |
|  | + | habitat |
|  | + | microhabitat |
|  | + | mesohabitat |
|  | + | macrohabitat |
|  | + | habitat suitability curves |
|  | + | biological model |
|  | + | species distribution model |
|  | + | habitat model |
|  | + | biology |
|  | + | life cycle |
|  | + | reproduction |
|  | + | spawning |
|  | + | adult habitat |
|  | + | juvenile habitat |
|  | + | spawning habitat |
|  | + | depth preferences |
|  | + | flow velocity preferences |
|  | + | substrate preferences |
|  | + | cover preferences |

**Table S2.** The physical habitat parameters of the MesoHABSIM model used for the GUs description in the Argentina Creek. For each habitat parameter the corresponding categories (Cat.) are expressed as reported in Vezza et al. (2014b; 2017). Within the review process exclusively Depth, Velocity, Substrate and Cover parameters were taken into account.

| **Habitat parameter** | **Units** | **Number of Categories** | **Categories (Cat.)/Description** |
| --- | --- | --- | --- |
| Geomorphic units (GUs) | yes/no | 17 | Pothole, Cascade, Rapid, Riffle, Step, Pool, Glide, Dune, Aquatic vegetation, Secondary channel, Flood lake, Wetland, Artificial element, Waterfall, Plunge pool, Backwater, Rock glide |
| GU gradient | % | 1 | bottom mean slope of the GU |
| GU longitudinal gradient | yes/no | 1 | habitat binary attribute describing mesohabitats longitudinal river connectivity |
| Depth | percentage of random samples | 9 | categories in 15 cm increments (range 0-120 cm and above) |
| Velocity | percentage of random samples | 9 | categories in 15 cm/s increments (range 0-120 cm/s and above) |
| Substrate | percentage of random samples | 12 | Gigalithal (GI), Megalithal (ME), Macrolithal (MA), Mesolithal (MS), Microlithal (MI), Akal (AK), Psammal (PS), Pelal (PE), Detritus (DE), Xylal (XY), Sapropel (SA), Phytal (PH) |
| Cover | yes/no | 11 | Boulder (BD), Canopy shading (CS), Overhanging vegetation (OV), Roots (RO), Submerged vegetation (SV), Floating vegetation (FV), Emerging vegetation (EV), Undercut bank (UB), Woody debris (WD), Riprap (RI), Shallow margins (SM) |
| Froude number | (flow velocity)/(9.81 depth)0.5 | 1 | average over the GU area |
| Flow velocity standard deviation | cm/s | 1 | SD over GU area |

**Table S3.** Number of bibliography sources (Num.) reporting the preferred categories (Cat.) of habitat parameters derived from the review analysis for each species, life stage (A=adult, J=juvenile) and bioperiod (S=spawning). Species are sorted with respect to the total amount of corresponding number of bibliography sources found (Pub.). The color-gradient is picturing high (21, blue) to low (0, red) number of bibliography sources reporting the preferred habitat categories . Water depth (D) and current velocity (V) are represented by 9 categories of 15 cm (from 0 up to > 120 cm) and 15 cm/s (from 0 up to > 120 cm/s) respectively. The codes used for substrate and cover categories are reported in Table S2. The Table shows, in numerical terms, the results depicted in Figure 1.


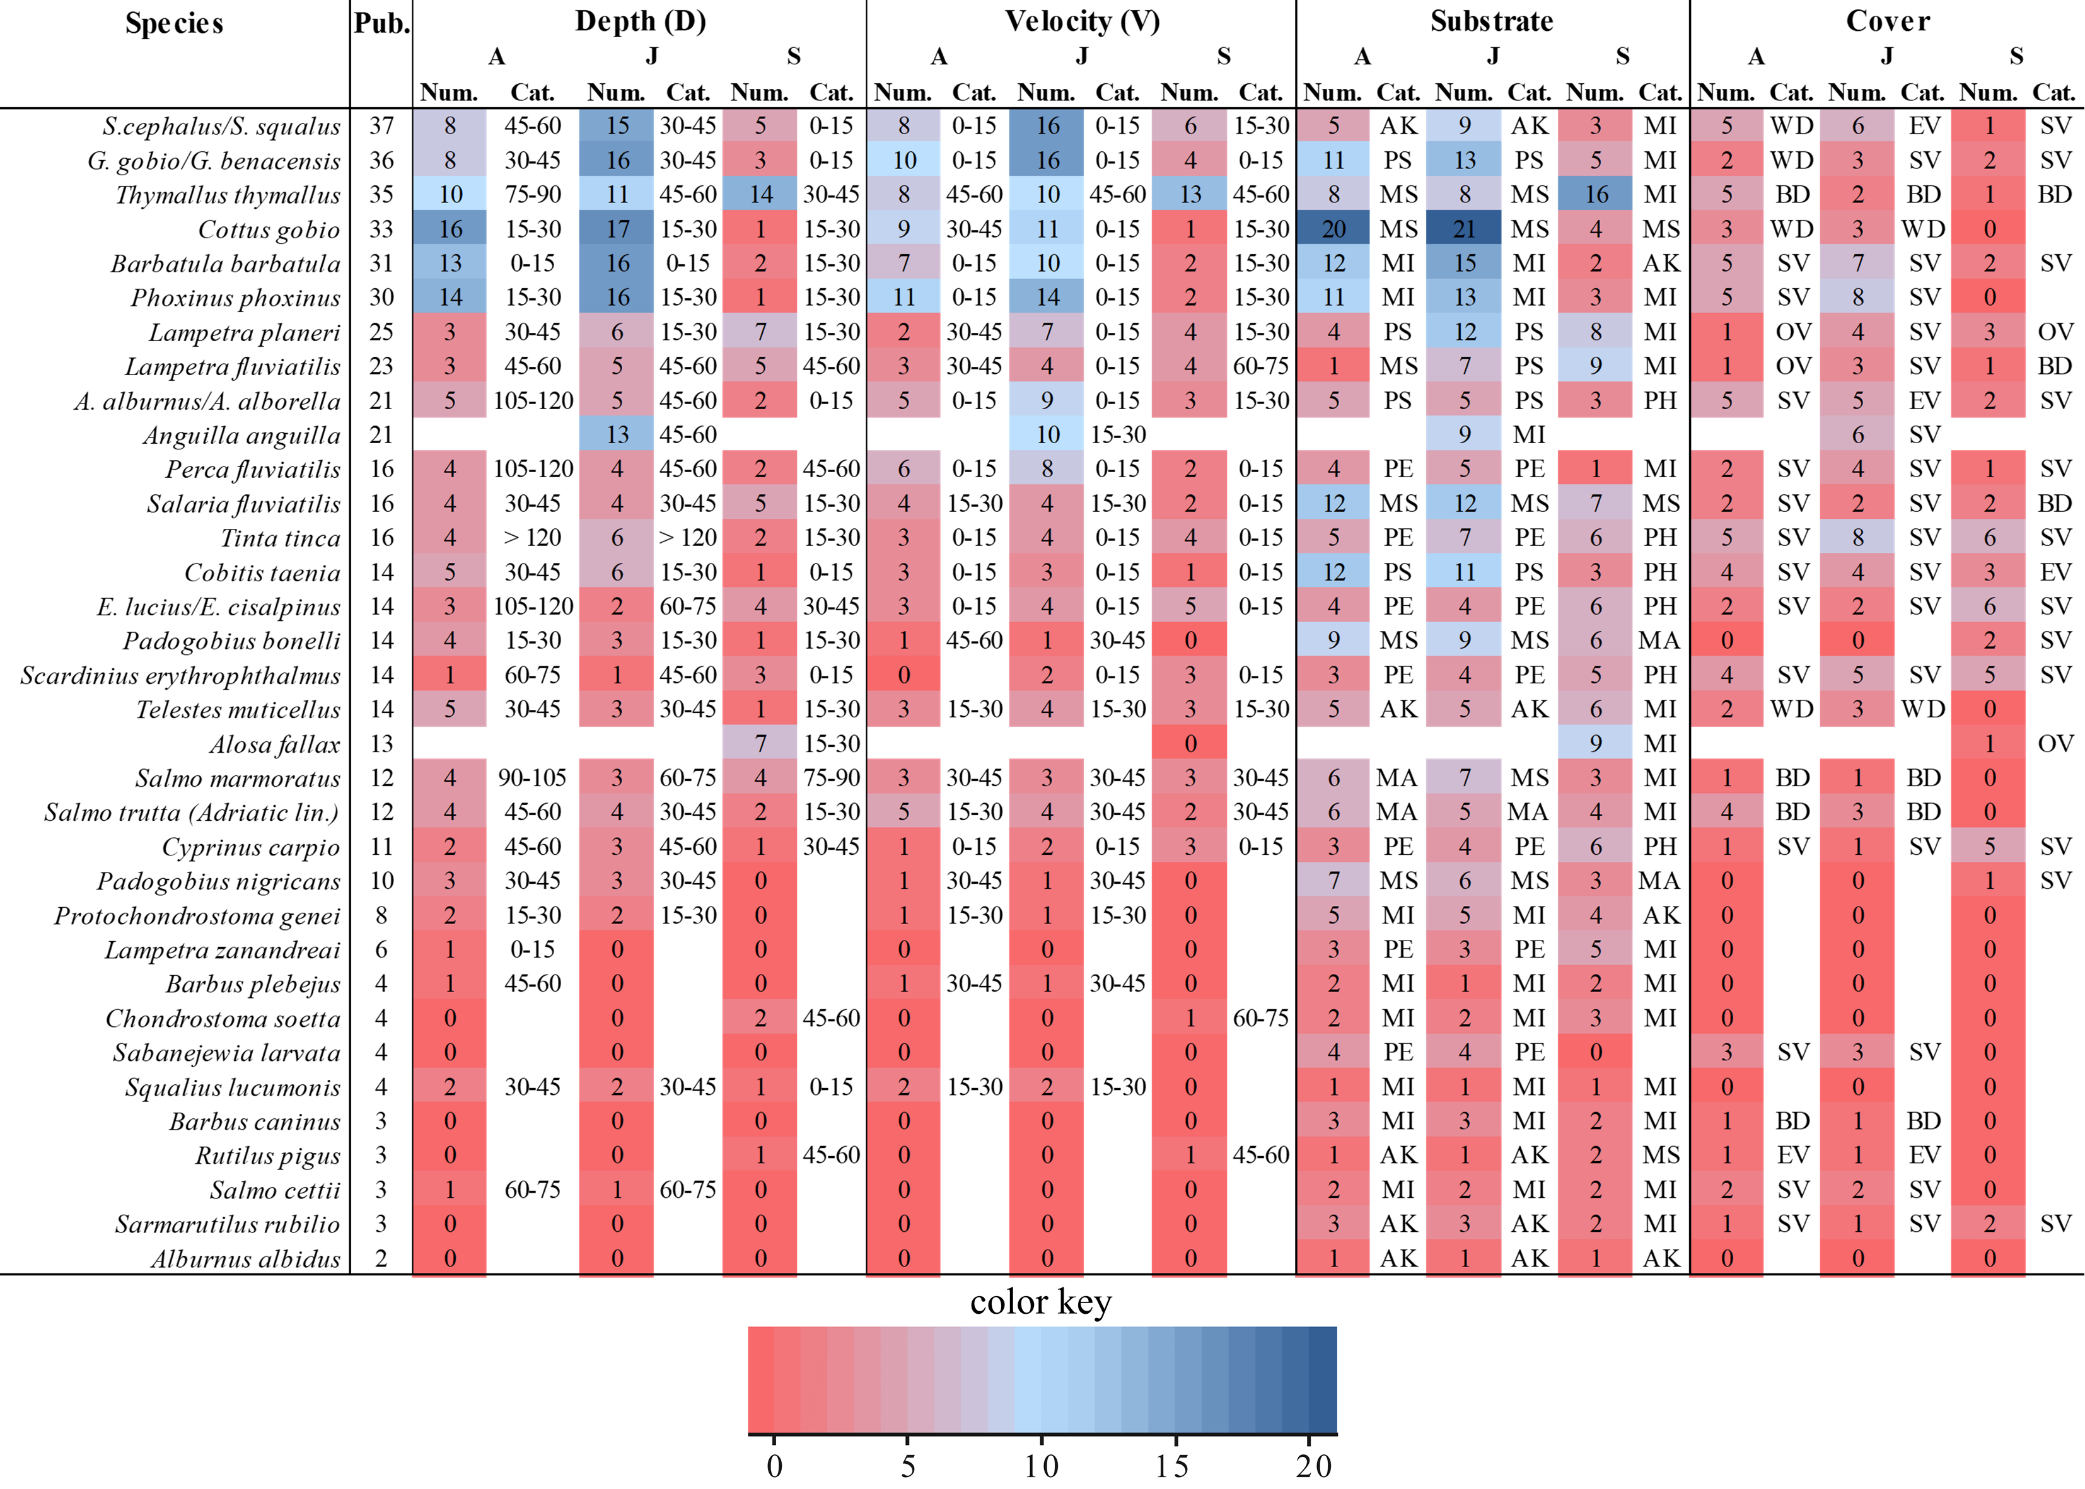


**Table S4.** List of bibliography sources considered in the study.

| **Author(s)** | **Year** | **Type** | **Citation** |
| --- | --- | --- | --- |
| Acou et al. | 2011 | paper | Acou, A., Rivot, E., Van Gils, J. A., Legault, A., Ysnel, F., and Feunteun, E. (2011). Habitat carrying capacity is reached for the European eel in a small coastal catchment: Evidence and implications for managing eel stocks. *Freshw. Biol.* 56, 952–968. doi:10.1111/j.1365-2427.2010.02540.x. |
| Allouche et al. | 1999 | paper | Allouche, S., Thévenet, A., and Gaudin, P. (1999). Habitat use by chub (Leuciscus cephalus L. 1766) in a large river, the French Upper Rhone, as determined by radiotelemetry. *Arch. fur Hydrobiol.* 145, 219–236. doi:10.1127/archiv-hydrobiol/145/1999/219. |
| Almeida et al. | 2011 | report | Almeida, P. R., Quintella, B. R., Mateus, C. S., Alexandre, C. M., Pereira, T., Ferreira, A. F., et al. (2011). Monitorização da migração reprodutora da lampreia-de-rio na sub-bacia hidrográfica do Rio Sorraia. Lisboa (PT). |
| Almeida et al. | 2017 | paper | Almeida, D., Fletcher, D. H., Rangel, C., García-Berthou, E., and da Silva, E. (2017). Dietary traits of invasive bleak Alburnus alburnus (Actinopterygii, Cyprinidae) between contrasting habitats in Iberian fresh waters. *Hydrobiologia* 795, 23–33. doi:10.1007/s10750-016-3052-8. |
| Aprahamian | 1982 | PhD thesis | Aprahamian, M. W. (1982). Aspects of the biology of the twaite shad, Alosa fallax fallax (Lacépéde) in the Rivers Severn and Wye. |
| Aprahamian et al. | 2003 | report | Aprahamian, M.W., Aprahamian, C. D., Bagliniere, J. L., Sabatie, R., and Alexandrino, P. (2003). Alosa alosa and Alosa fallax spp. Literature Review and Bibliography. Bristol (UK). |
| Arlinghaus and Wolter | 2003 | paper | Arlinghaus, R., and Wolter, C. (2003). Amplitude of ecological potential: Chub Leuciscus cephalus (L.) spawning in an artificial lowland canal. *J. Appl. Ichthyol.* 19, 52–54. doi:10.1046/j.1439-0426.2003.00343.x. |
| Armitage and Ladle | 1989 | report | Armitage, P. D., and Ladle, M. (1989). Habitat preferences of target species for application of PHABSIM testing. Wareham (UK): NERC Institute of Freshwater Ecology. |
| Aronsuu and Tertsunen | 2015 | paper | Aronsuu, K., and Tertsunen, J. (2015). Selection of spawning substratum by European river lampreys (Lampetra fluviatilis) in experimental tanks. *Mar. Freshw. Behav. Physiol.* 48, 41–50. doi:10.1080/10236244.2014.987453. |
| Aronsuu et al. | 2015 | paper | Aronsuu, K., Marjomäki, T. J., Tuohino, J., Wennman, K., Vikström, R., and Ojutkangas, E. (2015). Migratory behaviour and holding habitats of adult river lampreys (Lampetra fluviatilis) in two Finnish rivers. *Boreal Environ. Res.* 20, 120–144. |
| Ayllón et al. | 2009 | paper | Ayllón, D., Almodóvar, A., Nicola, G. G., and Elvira, B. (2009). Interactive effects of cover and hydraulics on brown trout habitat selection patterns. *River Res. Appl.* 25, 1051–1065. doi:10.1002/rra.1215. |
| Baars et al. | 2001 | book | Baars, M., Mathes, E., Stein, H., and Steinhörster, U. (2001). Die Äsche Thymallus thymallus. Hohenwarsleben (DE): Westarp Wissenschaften. |
| Banaduc | 2005 | paper | Banaduc, D. (2005). Fish associations-habitats quality relation in the Târnave rivers (Transylvania, Romania) ecological assessment. *Transylvanian Rev. Syst. Ecol. Res.*, 123. |
| Baras and Nindaba | 1999 | paper | Baras, E., and Nindaba, J. (1999). Seasonal and diel utilisation of inshore microhabitats by larvae and juveniles of Leuciscus cephalus and Leuciscus leuciscus. *Environ. Biol. Fishes* 56, 183–197. doi:10.1023/a:1007594932734. |
| Baras et al. | 1998 | paper | Baras, E., Jeandrain, D., Serouge, B., and Philippart, J. C. (1998). Seasonal variations in time and space utilization by radio-tagged yellow eels Anguilla anguilla (L.) in a small stream. *Hydrobiologia* 371–372, 187–198. doi:10.1007/978-94-011-5090-3_22. |
| Bardonnet et al. | 1991 | paper | Bardonnet, A., Gaudin, P., and Persat, H. (1991). Microhabitats and diel downstream migration of young grayling (Thymallus thymallm L.). *Freshw. Biol.* 26, 365–376. doi:10.1111/j.1365-2427.1991.tb01404.x. |
| Beyer et al. | 2007 | paper | Beyer, K., Copp, G. H., and Gozlan, R. E. (2007). Microhabitat use and interspecific associations of introduced topmouth gudgeon Pseudorasbora parva and native fishes in a small stream. *J. Fish Biol.* 71, 224–238. doi:10.1111/j.1095-8649.2007.01677.x. |
| Białokoz et al. | 2009 | paper | Białokoz, W., Chybowski, Ł., Krzywosz, T., and Traczuk, P. (2009). Ichthyofauna of the rivers in the Romincka Forest (Pregola River basin, northeastern Poland). *Arch. Polish Fish.* 17, 77–84. doi:10.2478/v10086-009-0005-0. |
| Bianco | 1995 | paper | Bianco, P. G. (1995). Mediterranean endemic freshwater fishes of Italy. *Biol. Conserv.* 72, 159–170. doi:10.1016/0006-3207(94)00078-5. |
| Bianco | 2003 | book section | Bianco, P. G. (2003). “Barbus caninus Bonaparte, 1839,” in *The freshwater fishes of Europe, Volume 5/II, Cyprinidae 2, Part II: Barbus*, eds. P. Banarescu and N. G. Bogutskaya (Wiesbaden (DE): Aula-Verlag). |
| Bicchi et al. | 2006 | paper | Bicchi, A., Angeli, V., Carosi, A., La Porta, G., Mearelli, M., Pedicillo, G., et al. (2006). Curve di preferenza delle principali specie ittiche del bacino del fiume Tevere (Umbria, Italia). in *XVI Congresso della Società Italiana di Ecologia, Viterbo/Civitavecchia* (Viterbo/Civitavecchia (IT)). |
| Blanco-Garrido et al. | 2009 | paper | Blanco-Garrido, F., Clavero, M., and Prenda, J. (2009). Jarabugo (Anaecypris hispanica) and freshwater blenny (Salaria fluviatilis): habitat preferences and relationship with exotic fish species in the middle Guadiana basin. *Limnetica* 28, 139–148. |
| Bless | 1982 | paper | Bless, R. (1982). Untersuchungen zur substratpraferenz der Groppe, Cottus gobio Linnaeus 1758 (Pisces: Cottidae). *Senckenb. Biol.* 63, 161–165. |
| Bless | 1992 | book | Bless, R. (1992). *Einsichten in die Ökologie der Elritze Phoxinus phoxinus (L.): praktische Grundlagen zum Schutz einer gefährdeten Fischart*. , ed. Bundesforschungsanstalt für Naturschutz und Landschaftsökologie Bundesforschungsanstalt für Naturschutz und Landschaftsökologie. |
| Bless | 1996 | book section | Bless, R. (1996). “Reproduction and habitat preference of the threatened spirlin (Alburnoides bipunctatus Bloch) and soufie (Leuciscus souffia Risso) under laboratory conditions (Teleostei: Cyprinidae),” in *Conservation of Endangered Freshwater Fish in Europe*, eds. A. Kirchhofer and D. Hefti (Basel (CH): Birkhäuser), 249–258. doi:10.1007/978-3-0348-9014-4_24. |
| Bo et al. | 2011 | paper | Bo, T., Cammarata, M., Candiotto, A., Fenoglio, S., López-Rodríguez, M. J., de Figueroa, J. M. T., et al. (2011). Feeding habits of Padogobius bonelli (Bonaparte, 1846) (Osteichthyes, Gobiidae): The importance of fish dimensions and hydrological conditions. *Ital. J. Zool.* 78, 390–397. doi:10.1080/11250001003777168. |
| Bohl | 1995 | paper | Bohl, E. (1995). Habitatansprüche und Gefährdungspotential von Neunaugen. *Fischökologie* 8, 81–92. |
| Bohl et al. | 2004 | paper | Bohl, E., Herrmann, M., Ott, B., Seitz, B., and Heise, J. (2004). Untersuchungen zur Fortpflanzungsbiologie, Entwicklung und zu den Lebensräumen von Schneider (Alburnoides bipunctatus BLOCH 1782) und Strömer (Leuciscus souffia agassizi VALENCIENNES 1844)-Abschlussbericht über die Untersuchungen 2002-2004. *Bayer. Landesamt für Wasserwirtschaft, Abteilung Gewässerökologische Forschung, Ref. Fischökologie*, 96. |
| Bohlen | 2003 | paper | Bohlen, J. (2003). Spawning habitat in the spined loach, Cobitis taenia (Cypriniformes: Cobitidae). *Ichthyol. Res.* 50, 98–101. doi:10.1007/s102280300016. |
| Bohlen and Mlynek | 2003 | PhD thesis | Bohlen, J., and Mlynek, J. (2003). Untersuchungen zur Autökologie des Steinbeißers, Cobitis taenia. |
| Bohlen et al. | 2003 | paper | Bohlen, J., Šlechtová, V., Šanda, R., Kalous, L., Freyhof, J., Vukic, J., et al. (2003). Cobitis ohridana and Barbatula zetensis in the River Morača Basin, Montenegro: Distribution, Habitat, Population Structure and Conservation Needs. *Folia Biol. (Praha).* 51, 147–153. |
| Brämick et al. | 2015 | paper | Brämick, U., Fladung, E., and Simon, J. (2015). Stocking is essential to meet the silver eel escapement target in a river system with currently low natural recruitment. *ICES J. Mar. Sci.* 73, 91–100. doi:10.1093/icesjms/fsv113. |
| Bry | 1996 | book section | Bry, C. (1996). “Role of vegetation in the life cycle of pike,” in *Pike*, ed. J. F. Craig (Dordrecht (NL): Springer), 45–67. doi:10.1007/978-94-015-8775-4_3. |
| Bylak et al. | 2014 | paper | Bylak, A., Kukuła, K., and Mitka, J. (2014). Beaver impact on stream fish life histories: The role of landscape and local attributes. *Can. J. Fish. Aquat. Sci.* 71, 1603–1615. doi:10.1139/cjfas-2014-0105. |
| Caffrey et al. | 2008 | paper | Caffrey, J. M., Acevedo, S., Gallagher, K., and Britton, R. (2008). Chub (Leuciscus cephalus): A new potentially invasive fish species in Ireland. *Aquat. Invasions* 3, 201–209. doi:10.3391/ai.2008.3.2.11. |
| Ćaleta et al. | 2015 | book | Ćaleta, M., Buj, I., Mrakovčić, M., Mustafić, P., Zanella, D., Marčić, Z., et al. (2015). *Endemic fishes of Croatia*. Zagreb (HR): Croatian Environment Agency. |
| Carter et al. | 2004 | paper | Carter, M. G., Copp, G. H., and Szomlai, V. (2004). Seasonal abundance and microhabitat use of bullhead Cottus gobio and accompanying fish species in the River Avon (Hampshire), and implications for conservation. *Aquat. Conserv. Mar. Freshw. Ecosyst.* 14, 395–412. doi:10.1002/aqc.617. |
| Cassou-Leins and Cassou-Leins | 1981 | PhD thesis | Cassou-Leins, F., and Cassou-Leins, J. J. (1981). Recherches sur la biologie et l’halieutique des migrateurs de la Garonne et principalement de l’alose, Alosa alosa Linné. |
| Caswell and Aprahamian | 2001 | paper | Caswell, P. A., and Aprahamian, M. W. (2001). Use of river habitat survey to determine the spawning habitat characteristics of twaite shad (alosa fallax fallax). *BFPP - Bull. Fr. la Pech. la Prot. des Milieux Aquat.*, 919–929. doi:10.1051/kmae:2001027. |
| Consorzio Parco Lombardo della Valle del Ticino. | 2007 | report | Consorzio Parco Lombardo della Valle del Ticino. (2007). Il pigo (Rutilus Pigus). Studio dell’autoecologia della specie nel fiume Ticino. Pontevecchio di Magenta (IT). |
| Copp | 1991 | paper | Copp, G. H. (1991). Typology of aquatic habitats in the great ouse, a small regulated lowland river. *Regul. Rivers Res. Manag.* 6, 125–134. doi:10.1002/rrr.3450060208. |
| Copp | 1992 | paper | Copp, G. H. (1992). Comparative microhabitat use of cyprinid larvae and juveniles in a lotic floodplain channel. *Environ. Biol. Fishes* 33, 181–193. doi:10.1007/BF00002563. |
| Copp | 1992 | paper | Copp, G. H. (1992). An empirical model for predicting microhabitat of 0+ juvenile fishes in a lowland river catchment. *Oecologia* 91, 338–345. doi:10.1007/BF00317621. |
| Copp | 1993 | paper | Copp, G. H. (1993). Microhabitat use of fish larvae and 0+ juveniles in a small abandoned channel of the upper River Rhône, France. *Folia Zool.* 42, 153–164. |
| Copp | 1997 | paper | Copp, G. H. (1997). Microhabitat use of fish larvae and 0+ juveniles in a highly regulated section of the River Great Ouse. *Regul. Rivers Res. Manag.* 13, 267–276. doi:10.1002/(SICI)1099-1646(199705)13:3<267::AID-RRR454>3.0.CO;2-B. |
| Copp and Kováč | 2003 | paper | Copp, G. H., and Kováč, V. (2003). Sympatry between threespine Gasterosteus aculeatus and ninespine Pungitius pungitius sticklebacks in English lowland streams. *Ann. Zool. Fennici* 40, 341–355. |
| Copp and Mann | 1993 | paper | Copp, G. H., and Mann, R. H. K. (1993). Comparative growth and diet of tench Tinca tinca (L.) larvae and juveniles from river floodplain biotopes in France and England. *Ecol. Freshw. Fish* 2, 58–66. doi:10.1111/j.1600-0633.1993.tb00084.x. |
| Copp and Vilizzi | 2004 | paper | Copp, G. H., and Vilizzi, L. (2004). Spatial and ontogenetic variability in the microhabitat use of stream-dwelling spined loach (Cobitis taenia) and stone loach (Barbatula barbatula). *J. Appl. Ichthyol.* 20, 440–451. doi:10.1111/j.1439-0426.2004.00605.x. |
| Copp et al. | 1994 | paper | Copp, G. H., Guti, G., Rovný, B., and Černý, J. (1994). Hierarchical analysis of habitat use by 0+ juvenile fish in Hungarian/Slovak flood plain of the Danube River. *Environ. Biol. Fishes* 40, 329–348. doi:10.1007/BF00005279. |
| Copp et al. | 1994 | paper | Copp, G. H., Warrington, S., and de Bruine, Q. (1994). Comparison of diet in bullhead, Cottus gobio and stone loach, Barbatula barbatula in a small English lowland river. *Folia Zool.* 43, 171–176. |
| Copp et al. | 2010 | paper | Copp, G. H., Kováč, V., and Siryová, S. (2010). Microhabitat use by stream-dwelling spirlin Alburnoides bipunctatus and accompanying species: Implications for conservation. *Folia Zool.* 59, 240–256. doi:10.25225/fozo.v59.i3.a10.2010. |
| Costa et al. | 2008 | paper | Costa, J. L., Domingos, I., Assis, C. A., Almeida, P. R., Moreira, F., Feunteun, E., et al. (2008). Comparative ecology of the European eel, Anguilla anguilla (L., 1758), in a large Iberian river. *Environ. Biol. Fishes* 81, 421–434. doi:10.1007/s10641-007-9229-2. |
| Cote et al. | 1998 | paper | Cote, I. M., Vinyoles, D., Reynolds, J. D., Doadrio, I., and Perdices, A. (1998). Potential impacts of gravel extraction on Spanish populations of river blennies Salaria fluviatilis (Pisces, Blenniidae). *Biol. Conserv.* 87, 359–367. doi:10.1016/S0006-3207(98)00072-X. |
| Cowx and Welcomme | 1998 | book | Cowx, I. G., and Welcomme, R. L. (1998). *Rehabilitation of Rivers for Fish*. , eds. I. G. Cowx and R. L. Welcomme London (UK): Food & Agriculture Organization (FAO). |
| Cowx et al. | 2001 | report | Cowx, I. G., Pitts, C. S., and Smith, K. L. (2001). Factors influencing coarse fish populations in rivers. Bristol (UK): Environment Agency. |
| Cowx et al. | 2004 | report | Cowx, I. G., Noble, R. A., Nunn, A. D., Harvey, J. P., Welcomme, R. L., and Halls, A. S. (2004). Flow and Level Criteria for Coarse Fish and Conservation Species. Bristol (UK): Environment Agency. |
| Crivelli | 1981 | paper | Crivelli, A. J. (1981). The biology of the common carp, Cyprinus carpio L. in the Camargue, southern France. *J. Fish Biol.* 18, 271–290. doi:10.1111/j.1095-8649.1981.tb03769.x. |
| Curtean-Bănăduc et al. | 2019 | paper | Curtean-Bănăduc, A., Cismaş, I.-C., and Bănăduc, D. (2019). Management Elements for Two Alburninae Species, Alburnus alburnus (Linnaeus, 1758) and Alburnoides bipunctatus (Bloch, 1782) Based on a Decision-Support System Study Case. *Transylvanian Rev. Syst. Ecol. Res.* 21, 81–92. |
| D’Amen et al. | 2017 | paper | D’Amen, M., Bombi, P., Traversetti, L., and Scalici, M. (2017). Relazione fra la presenza di Telestes muticellus (Bonaparte, 1837) e Rutilus rubilio (Bonaparte, 1837) e alcune caratteristiche ambientali. *Ital. J. Freshw. Ichthyol.*, 227–233. |
| Darchambeau and Poncin | 1997 | paper | Darchambeau, F., and Poncin, P. (1997). Field observations of the spawning behaviour of European grayling. *J. Fish Biol.* 51, 1066–1068. |
| Davey et al. | 2005 | paper | Davey, A. J. H., Hawkins, S. J., Turner, G. F., and Doncaster, C. P. (2005). Size-dependent microhabitat use and intraspecific competition in Cottus gobio. *J. Fish Biol.* 67, 428–443. doi:10.1111/j.0022-1112.2005.00736.x. |
| Degerman et al. | 2019 | paper | Degerman, E., Tamario, C., Watz, J., Nilsson, P. A., and Calles, O. (2019). Occurrence and habitat use of European eel (Anguilla anguilla) in running waters: lessons for improved monitoring, habitat restoration and stocking. *Aquat. Ecol.* 53, 639–650. doi:10.1007/s10452-019-09714-3. |
| Delmastro et al. | 1987 | paper | Delmastro, G. B., Giudice, G., and Lodi, E. (1987). Il Cobite mascherato Sabanejewia larvata (De Fil.) nelle acque del Fiume Ticino (Osteichthyes Cobitidae). *Riv. Piem. St. Nat* 8, 261–263. |
| Doherty et al. | 2004 | paper | Doherty, D., O’Maoiléidigh, N., and McCarthy, T. K. (2004). The biology, ecology and future conservation of twaite shad (Alosa fallax lacépède), allis shad (Alosa alosa L.) and Killarney shad (Alosa fallax killarnensis tate regan) in Ireland. *Biol. Environ. Proc. R. Irish Acad.* 104, 93–102. doi:10.3318/BIOE.2004.104.3.93. |
| Domingos et al. | 2006 | paper | Domingos, I., Costa, J. L., and Costa, M. J. (2006). Factors determining length distribution and abundance of the European eel, Anguilla anguilla, in the River Mondego (Portugal). *Freshw. Biol.* 51, 2265–2281. doi:10.1111/j.1365-2427.2006.01656.x. |
| Duchi | 2011 | paper | Duchi, A. (2011). Fecundity, egg and alevin size in the River Irminio population of the threatened Salmo cettii Rafinesque-Schmaltz, 1810 (Sicily, Italy). *J. Appl. Ichthyol.* 27, 868–872. doi:10.1111/j.1439-0426.2010.01617.x. |
| Dyk | 1984 | paper | Dyk, V. (1984). The Characteristics of Grayling Biotopes. *Acta Vet. Brno* 53, 71–80. doi:10.2754/avb198453010071. |
| Eglite | 1958 | paper | Eglite, R. (1958). Feeding habits of river lamprey in the Latvian SSR. *Gidrol Issle Tallinn* 1, 234–269. |
| Elvira | 1995 | paper | Elvira, B. (1995). Conservation status of endemic freshwater fish in Spain. *Biol. Conserv.* 72, 129–136. doi:10.1016/0006-3207(94)00076-3. |
| Fabricius and Gustafson | 1955 | book | Fabricius, E., and Gustafson, K.-J. (1955). *Observations on the spawning behaviour of the grayling, Thymallus thymallus (L.)*. Drottningholm (SE): National Swedish Board of Fisheries. |
| Ferreira et al. | 2013 | paper | Ferreira, A. F., Quintella, B. R., Maia, C., Mateus, C. S., Alexandre, C. M., Capinha, C., et al. (2013). Influence of macrohabitat preferences on the distribution of European brook and river lampreys: Implications for conservation and management. *Biol. Conserv.* 159, 175–186. doi:10.1016/j.biocon.2012.11.013. |
| Feunteun et al. | 1998 | paper | Feunteun, E., Acou, A., Guillouët, J., Laffaille, P., and Legault, A. (1998). Spatial distribution of an eel population (Anguilla anguilla L.) in a small coastal catchment of northern Brittany (France). Consequences of hydraulic works. *BFPP - Bull. Fr. la Pech. la Prot. des Milieux Aquat.* 71, 129–139. doi:10.1051/kmae:1998038. |
| Feunteun et al. | 2003 | book section | Feunteun, E., Laffaille, P., Robinet, T., Briand, C., Baisez, A., Olivier, J.-M., et al. (2003). “A Review of Upstream Migration and Movements in Inland Waters by Anguillid Eels: Toward a General Theory,” in *Eel Biology*, ed. Aida K KTKY (Tokio (JP): Springer), 191–213. doi:10.1007/978-4-431-65907-5_14. |
| Fladung et al. | 2003 | paper | Fladung, E., Scholten, M., and Thiel, R. (2003). Modelling the habitat preferences of preadult and adult fishes on the shoreline of the large, lowland Elbe River. *J. Appl. Ichthyol.* 19, 303–314. doi:10.1046/j.1439-0426.2003.00506.x. |
| Fornaroli et al. | 2016 | paper | Fornaroli, R., Cabrini, R., Sartori, L., Marazzi, F., Canobbio, S., and Mezzanotte, V. (2016). Optimal flow for brown trout: Habitat – prey optimization. *Sci. Total Environ.* 566–567, 1568–1578. doi:10.1016/j.scitotenv.2016.06.047. |
| Fredrich et al. | 2003 | paper | Fredrich, F., Ohmann, S., Curio, B., and Kirschbaum, F. (2003). Spawning migrations of the chub in the River Spree, Germany. *J. Fish Biol.* 63, 710–723. doi:10.1046/j.1095-8649.2003.00184.x. |
| Freeman et al. | 1990 | paper | Freeman, M. C., Viñolas, D., Grossman, G. D., and De Sostoa, A. (1990). Microhabitat use by Blennius fluviatilis in the Río Matarraña, Spain. *Freshw. Biol.* 24, 335–345. doi:10.1111/j.1365-2427.1990.tb00714.x. |
| Fukuda et al. | 2013 | paper | Fukuda, S., De Baets, B., Waegeman, W., Verwaeren, J., and Mouton, A. M. (2013). Habitat prediction and knowledge extraction for spawning European grayling (Thymallus thymallus L.) using a broad range of species distribution models. *Environ. Model. Softw.* 47, 1–6. doi:10.1016/j.envsoft.2013.04.005. |
| Gandolfi | 1991 | book | Gandolfi, G. (1991). *I pesci delle acque interne italiane*. , ed. Istituto poligrafico e Zecca dello Stato - Libreria dello stato Roma (IT): Istituto poligrafico e Zecca dello Stato, Libreria dello Stato. |
| Garner | 1996 | paper | Garner, P. (1996). Microhabitat use and diet of 0+ cyprinid fishes in a lentic, regulated reach of the River Great Ouse, England. *J. Fish Biol.* 48, 367–382. doi:10.1111/j.1095-8649.1996.tb01434.x. |
| Garner | 1996 | paper | Garner, P. (1996). Diel patterns in the feeding and habitat use of 0-group fishes in a regulated river: The River Great Ouse, England. *Ecol. Freshw. Fish* 5, 175–182. doi:10.1111/j.1600-0633.1996.tb00131.x. |
| Garner et al. | 1998 | paper | Garner, P., Clough, S., Griffiths, S. W., Deans, D., and Ibbotson, A. (1998). Use of shallow marginal habitat by Phoxinus phoxinus: a trade‐off between temperature and food? *J. Fish Biol.* 52, 600–609. doi:10.1111/j.1095-8649.1998.tb02020.x. |
| Gaudin and Caillere | 1990 | paper | Gaudin, P., and Caillere, L. (1990). Microdistribution of Cottus gobio L. and fry of Salmo trutta L. in a first order stream. *Pol. Arch. Hydrobiol. Arch. Hydrobiol.* 38, 81–93. |
| Gentili et al. | 2001 | paper | Gentili, G., Bosi, R. and Cambiaghi, M. (2001). Preferenze idraulico-morfologiche della Trota marmorata (Salmo (trutta) marmoratus) nel Fiume Sesia, in atti dell’VIII Convegno Nazionale A.I.I.A.D., Codroipo (UD) 29-30 giugno 2000. |
| Giannetto et al. | 2013 | paper | Giannetto, D., Carosi, A., Ghetti, L., Pedicillo, G., Pompei, L., and Lorenzoni, M. (2013). Ecological traits of Squalius lucumoni s (Actinopterygii, Cyprinidae) and main differences with those of Squalius squalus in the Tiber River Basin (Italy). *Knowl. Manag. Aquat. Ecosyst.* 409, 4. doi:10.1051/kmae/2013049. |
| Gönczi | 1989 | paper | Gönczi, A. P. (1989). A study of physical parameters at the spawning sites of the european grayling (Thymallus thymallus L.). *Regul. Rivers Res. Manag.* 3, 221–224. doi:10.1002/rrr.3450030121. |
| González et al. | 2000 | paper | González, G., Mazé, R. A., Domínguez, J., and Pena, J. C. (2000). Trophic ecology of the tench, Tinca tinca in two different habitats in North-West of Spain. *Cybium* 24, 123–138. |
| Goodwin et al. | 2008 | paper | Goodwin, C. E., Dick, J. T. A., Rogowski, D. L., and Elwood, R. W. (2008). Lamprey (Lampetra fluviatilis and Lampetra planeri) ammocoete habitat associations at regional, catchment and microhabitat scales in Northern Ireland. *Ecol. Freshw. Fish* 17, 542–553. doi:10.1111/j.1600-0633.2008.00305.x. |
| Gortázar et al. | 2012 | paper | Gortázar, J., Alonso, C., and García de Jalón, D. (2012). Brown trout redd superimposition in relation to spawning habitat availability. *Ecol. Freshw. Fish* 21, 283–292. doi:10.1111/j.1600-0633.2011.00546.x. |
| Gosselin et al. | 2010 | paper | Gosselin, M. P., Petts, G. E., and Maddock, I. P. (2010). Mesohabitat use by bullhead (Cottus gobio). *Hydrobiologia* 652, 299–310. doi:10.1007/s10750-010-0363-z. |
| Gozlan et al. | 1998 | paper | Gozlan, R. E., Mastrorillo, S., Dauba, F., Tourenq, J. N., and Copp, G. H. (1998). Multi-scale analysis of habitat use during late summer for 0+ fishes in the River Garonne (France). *Aquat. Sci.* 60, 99–117. doi:10.1007/s000270050028. |
| Greenberg et al. | 1996 | paper | Greenberg, L., Svendsen, P., and Harby, A. (1996). Availability of microhabitats and their use by brown trout (Salmo trutta) and grayling (Thymallus thymallus) in the River Vojmån, Sweden. *Regul. Rivers Res. Manag.* 12, 287–303. doi:10.1002/(sici)1099-1646(199603)12:2/3<287::aid-rrr396>3.0.co;2-3. |
| Grenouillet and Pont | 2001 | paper | Grenouillet, G., and Pont, D. (2001). Juvenile fishes in macrophyte beds: influence of food resources, habitat structure and body size. *J. Fish Biol.* 59, 939–959. doi:10.1111/j.1095-8649.2001.tb00163.x. |
| Grenouillet et al. | 2000 | paper | Grenouillet, G., Pont, D., and Olivier, J. M. (2000). Habitat occupancy patterns of juvenile fishes in a large lowland river: Interactions with macrophytes. *Arch. fur Hydrobiol.* 149, 307–326. doi:10.1127/archiv-hydrobiol/149/2000/307. |
| Grift et al. | 2003 | paper | Grift, R. E., Buijse, A. D., Van Densen, W. L. T., Machiels, M. A. M., Kranenbarg, J., Klein Breteler, J. G. P., et al. (2003). Suitable habitats for 0-group fish in rehabilitated floodplains along the lower River Rhine. *River Res. Appl.* 19, 353–374. doi:10.1002/rra.711. |
| Grossman and De Sostoa | 1994 | paper | Grossman, G. D., and De Sostoa, A. (1994). Microhabitat use by fish in the lower Rio Matarraña, Spain, 1984–1987. *Ecol. Freshw. Fish* 3, 123–136. doi:10.1111/j.1600-0633.1994.tb00114.x. |
| Gubbels | 1997 | paper | Gubbels, R.E.M.B. (1997) Preferred hiding places of the bullhead (Cottus gobio L.,1758) in the Zieversbeek brook. Natuurhistorisch Maandblad 68, 201–206. |
| Guthruf | 1996 | PhD thesis | Guthruf, J. (1996). Populationsdynamik und Habitatwahl der Äsche (Thymallus thymallus L.) in drei verschiedenen Gewässern des schweizerischen Mittellandes. PhD. doi:10.3929/ethz-a-001693950. |
| Harby et al. | 2007 | paper | Harby, A., Olivier, J. M., Merigoux, S., and Malet, E. (2007). A mesohabitat method used to assess minimum flow changes and impacts on the invertebrate and fish fauna in the Rhône River, France. *River Res. Appl.* 23, 525–543. doi:10.1002/rra.997. |
| Hardisty | 1944 | paper | Hardisty, M. W. (1944). The Life History and Growth of the Brook Lamprey (Lampetra planeri). *J. Anim. Ecol.* 13, 110. doi:10.2307/1444. |
| Hardisty and Potter | 1971 | book section | Hardisty, M. W., and Potter, I. C. (1971). “The general biology of adult lampreys,” in *The biology of lampreys*, eds. M. Hardisty and I. Potter (London (UK)), 127–206. |
| Harvey and Cowx | 2003 | report | Harvey, J., and Cowx, I. (2003). Monitoring the river, brook and sea lamprey, Lampetra fluviatilis, L. planeri and Petromyzon marinus. Peterborough (UK): Environment Agency. |
| Hillman | 2003 | report | Hillman, R. (2003). The Distribution, Biology and Ecology of Shad in South-West England. Bristol (UK): Environment Agency. |
| Holcik | 1986 | book | Holcik, J. (1986). *The freshwater fishes of Europe. Volume 1, Part 1: Petromyzontiformes*. , ed. J. Holcik Wiesbaden (DE): Aula-Verlag. |
| Hübner | 2003 | PhD thesis | Hübner, D. (2003). Die Ablaich-und Interstitialphase der Äsche (Thymallus thymallus L.)-Grundlagen und Auswirkungen anthropogener Belastungen. |
| Huggins and Thompson | 1970 | paper | Huggins, R. J., and Thompson, A. (1970). Communal spawning of brook and river lampreys, Lampetra planeri Bloch and Lampetra fluviatilis L. *J. Fish Biol.* 2, 53–54. doi:10.1111/j.1095-8649.1970.tb03256.x. |
| Hydrodata. | 2002 | report | Hydrodata. (2002). Curve di preferenza del temolo e della trota marmorata. |
| Ibbotson et al. | 2001 | report | Ibbotson, A. T., Cove, R. J., Ingraham, A., Gallagher, M., Hornby, D. D., Furse, M., et al. (2001). A Review of Grayling Ecology, Status and Management Practice Recommendations for Future Management in England and Wales. Bristol (UK): Environment Agency. |
| Jang and Lucas | 2005 | paper | Jang, M. H., and Lucas, M. C. (2005). Reproductive ecology of the river lamprey. *J. Fish Biol.* 66, 499–512. doi:10.1111/j.0022-1112.2005.00618.x. |
| Jankauskienė and Jurgaitytė | 2008 | paper | Jankauskienė, R., and Jurgaitytė, A. (2008). Distribution of juvenile river lamprey (Lampetra fluviatilis L.) in different habitats. *Ekologija* 54, 104–109. doi:10.2478/v10055-008-0017-x. |
| Janković | 1964 | book | Janković, D. (1964). *Synopsis of biological data on European grayling: thymallus thymallus (Linnaeus) 1758*. , ed. Fisheries Division Biology Branch - Food and Agriculture Organization of the United Nations Fisheries Division, Biology Branch, Food and Agriculture Organization of the United Nations. |
| Jansen et al. | 2000 | paper | Jansen, W., Tham, J., Watzke, S., and Rahmann, H. (2000). Habitats and densities of bullhead ( Cottus gobio L.) in a South German bog stream. *Int. Vereinigung für Theor. und Angew. Limnol. Verhandlungen* 27, 3021–3024. doi:10.1080/03680770.1998.11898231. |
| Jurajda | 1999 | paper | Jurajda, P. (1999). Comparative nursery habitat use by 0+ fish in a modified lowland river. *River Res. Appl.* 15, 113–124. doi:10.1002/(sici)1099-1646(199901/06)15:1/3<113::aid-rrr529>3.0.co;2-3. |
| Kainua and Valtonen | 1980 | paper | Kainua, K., and Valtonen, T. (1980). Distribution and Abundance of European River Lamprey ( Lampetra fluviatilis ) Larvae in Three Rivers Running into Bothnian Bay, Finland. *Can. J. Fish. Aquat. Sci.* 37, 1960–1966. doi:10.1139/f80-236. |
| Keith and Allardi | 1996 | book section | Keith, P., and Allardi, J. (1996). “Endangered freshwater fish: The situation in France,” in *Conservation of Endangered Freshwater Fish in Europe*, eds. A. Kirchhofer and D. Hefti (Basel (CH): Birkhäuser), 35–54. doi:10.1007/978-3-0348-9014-4_5. |
| Kennedy and Fitzmaurice | 1970 | paper | Kennedy, M., and Fitzmaurice, P. (1970). The Biology of the Tench Tinca tinca (L.) in Irish Waters. *Proc. R. Irish Acad. Sect. B Biol. Geol. Chem. Sci.* 69, 31–82. |
| Kennedy and Fitzmaurice | 1972 | paper | Kennedy, M., and Fitzmaurice, P. (1972). Some aspects of the biology of gudgeon Gobio gobio (L.) in Irish waters. *J. Fish Biol.* 4, 425–440. doi:10.1111/j.1095-8649.1972.tb05690.x. |
| Kennedy and Fitzmaurice | 1974 | paper | Kennedy, M., and Fitzmaurice, P. (1974). Biology of the rudd Scardinius erythrophthalmus (L) in Irish waters. *Proc. R. Ir. Acad. B.* 74, 245–303. |
| Keresztessy | 1996 | book section | Keresztessy, K. (1996). “Threatened freshwater fish in Hungary,” in *Conservation of Endangered Freshwater Fish in Europe*, eds. A. Kirchhofer and D. Hefti (Basel (CH): Birkhäuser), 73–77. doi:10.1007/978-3-0348-9014-4_8. |
| Kirchhofer | 1996 | book section | Kirchhofer, A. (1996). “Fish conservation in Switzerland-three case-studies,” in *Conservation of endangered freshwater fish in Europe*, eds. A. Kirchhofer and D. Hefti (Basel (CH): Birkhäuser), 135–145. |
| Klaar et al. | 2004 | paper | Klaar, M., Copp, G. H., and Horsfield, R. (2004). Autumnal habitat use of non-native pumpkinseed Lepomis gibbosus and associations with native fish species in small English streams. *Folia Zool.* 53, 189–202. |
| Knaepkens et al. | 2002 | paper | Knaepkens, G., Bruyndoncx, L., Bervoets, L., and Eens, M. (2002). The presence of artificial stones predicts the occurrence of the European bullhead (Cottus gobio) in a regulated lowland river in Flanders (Belgium). *Ecol. Freshw. Fish* 11, 203–206. doi:10.1034/j.1600-0633.2002.00013.x. |
| Kottelat and Freyhof | 2007 | book | Kottelat, M., and Freyhof, J. (2007). *Handbook of European freshwater fishes*. Cornol (CH): Publications Kottelat. |
| Kováč et al. | 1999 | paper | Kováč, V., Copp, G. H., and Francis, M. P. (1999). Morphometry of the stone loach, Barbatula barbatula: Do mensural characters reflect the species’ life history thresholds? *Environ. Biol. Fishes* 56, 105–115. doi:10.1023/a:1007570716690. |
| Laffaille et al. | 2003 | paper | Laffaille, P., Feunteun, E., Baisez, A., Robinet, T., Acou, A., Legault, A., et al. (2003). Spatial organisation of European eel (Anguilla anguilla L.) in a small catchment. *Ecol. Freshw. Fish* 12, 254–264. doi:10.1046/j.1600-0633.2003.00021.x. |
| Laffaille et al. | 2004 | paper | Laffaille, P., Baisez, A., Rigaud, C., and Feunteun, E. (2004). Habitat preferences of different European eel size classes in a reclaimed marsh: A contribution to species and ecosystem conservation. *Wetlands* 24, 642–651. doi:10.1672/0277-5212(2004)024[0642:HPODEE]2.0.CO;2. |
| Lamouroux et al. | 1999 | paper | Lamouroux, N., Capra, H., Pouilly, M., and Souchon, Y. (1999). Fish habitat preferences in large streams of southern France. *Freshw. Biol.* 42, 673–687. doi:10.1046/j.1365-2427.1999.00521.x. |
| Langford and Hawkins | 1997 | paper | Langford, T. E. L., and Hawkins, S. J. (1997). The distribution and abundance of three fish species in relation to timber debris and mesohabitats in a lowland forest stream during autumn and winter. *Limnetica* 13, 93–102. |
| Langford et al. | 2012 | paper | Langford, T. E. L., Langford, J., and Hawkins, S. J. (2012). Conflicting effects of woody debris on stream fish populations: Implications for management. *Freshw. Biol.* 57, 1096–1111. doi:10.1111/j.1365-2427.2012.02766.x. |
| Laporte et al. | 2014 | paper | Laporte, M., Bertolo, A., Berrebi, P., and Magnan, P. (2014). Detecting anthropogenic effects on a vulnerable species, the freshwater blenny (Salaria fluviatilis): The importance of considering key ecological variables. *Ecol. Indic.* 36, 386–391. doi:10.1016/j.ecolind.2013.08.006. |
| Laporte et al. | 2016 | paper | Laporte, M., Claude, J., Berrebi, P., Perret, P., and Magnan, P. (2016). Shape plasticity in response to water velocity in the freshwater blenny Salaria fluviatilis. *J. Fish Biol.* 88, 1191–1203. doi:10.1111/jfb.12902. |
| Legalle et al. | 2005 | paper | Legalle, M., Mastrorillo, S., Santoul, F., and Céréghino, R. (2005). Ontogenetic microhabitat shifts in the bullhead, Cottus gobio L., in a fast flowing stream. *Int. Rev. Hydrobiol.* 90, 310–321. doi:10.1002/iroh.200410781. |
| Lengkeek and Didderen | 2006 | paper | Lengkeek, W., and Didderen, K. (2006). Breeding cycles and reproductive behaviour in the river blenny Salaria fluviatilis. *J. Fish Biol.* 69, 1837–1844. doi:10.1111/j.1095-8649.2006.01254.x. |
| Lohnisky | 1966 | paper | Lohnisky, K. (1966). The spawning behaviour of the brook lamprey, Lampetra planeri. *Vistn. isl. Spol. zool* 30, 289–307. |
| López et al. | 2007 | paper | López, M. A., Gázquez, N., Olmo-Vidal, J. M., Aprahamian, M. W., and Gisbert, E. (2007). The presence of anadromous twaite shad (Alosa fallax) in the Ebro River (western Mediterranean, Spain): An indicator of the population’s recovery? *J. Appl. Ichthyol.* 23, 163–166. doi:10.1111/j.1439-0426.2006.00797.x. |
| Lorenzoni et al. | 2010 | report | Lorenzoni, M., Ghetti, L., Carosi, A., and Dolciami, R. (2010). La fauna ittica ei corsi d’acqua dell’Umbria. Sintesi delle Carte Ittiche regionali dal 1986 al 2009. Perugia (IT). |
| Lorenzoni et al. | 2019 | paper | Lorenzoni, M., Carosi, A., Giovannotti, M., La Porta, G., Splendiani, A., and Caputo Barucchi, V. (2019). Ecology and conservation of the mediterranean trout in the central apennines (Italy). *J. Limnol.* 78, 1–13. doi:10.4081/jlimnol.2018.1806. |
| Lucas et al. | 2009 | paper | Lucas, M. C., Bubb, D. H., Jang, M. H., Ha, K., and Masters, J. E. G. (2009). Availability of and access to critical habitats in regulated rivers: Effects of low-head barriers on threatened lampreys. *Freshw. Biol.* 54, 621–634. doi:10.1111/j.1365-2427.2008.02136.x. |
| Lugli and Fine | 2003 | paper | Lugli, M., and Fine, M. L. (2003). Acoustic communication in two freshwater gobies: Ambient noise and short-range propagation in shallow streams. *J. Acoust. Soc. Am.* 114, 512–521. doi:10.1121/1.1577561. |
| Lugli et al. | 1992 | paper | Lugli, M., Bobbio, L., Torricelli, P., and Gandolfi, G. (1992). Breeding ecology and male spawning success in two hill-stream populations of the freshwater goby, Padogobius martensi. *Environ. Biol. Fishes* 35, 37–48. doi:10.1007/BF00001156. |
| Maddock et al. | 2008 | paper | Maddock, I., Smolar-Žvanut, N., and Hill, G. (2008). The effect of flow regulation on the distribution and dynamics of channel geomorphic units (CGUs) and implications for Marble Trout ( Salmo marmoratus ) spawning habitat in the Soča River, Slovenia . *IOP Conf. Ser. Earth Environ. Sci.* 4, 012026. doi:10.1088/1755-1307/4/1/012026. |
| Maier et al. | 1995 | paper | Maier, K. J., Zeh, M., Ortlepp, J., Zbinden, S., and Hefti, D. (1995). Verbreitung und Fortpflanzung der in der Schweiz vorkommenden Chondrostoma-Arten: Nase (C. nasus), Sofie (C. toxostoma), Savetta (C. soetta). *Mitteilungen zur Fischerei* 53. |
| Maitland | 2000 | report | Maitland, P. S. (2000). Ecology of the River, Brook and Sea Lamprey. Peterborough (UK): Environment Agency. |
| Mallet et al. | 2000 | paper | Mallet, J. P., Lamouroux, N., Sagnes, P., and Persat, H. (2000). Habitat preferences of European grayling in a medium size stream, the Ain river, France. *J. Fish Biol.* 56, 1312–1326. doi:10.1111/j.1095-8649.2000.tb02145.x. |
| Malmqvist | 1980 | paper | Malmqvist, B. (1980). Habitat selection of larval brook lampreys (Lampetra planeri, Bloch) in a South Swedish stream. *Oecologia* 45, 35–38. doi:10.1007/BF00346704. |
| Mann | 1980 | paper | Mann, R. H. K. (1980). The growth and reproductive strategy of the gudgeon, Gobio gobio (L.), in two hard‐water rivers in southern England. *J. Fish Biol.* 17, 163–176. doi:10.1111/j.1095-8649.1980.tb02750.x. |
| Mann | 1996 | paper | Mann, R. H. K. (1996). Environmental requirements of European non-salmonid fish in rivers. *Hydrobiologia* 323, 223–235. doi:10.1007/BF00007848. |
| Maran et al. | 2002 | paper | Maran, S., Gentili, G., Bosi, R., and Romanò, A. (2002). Preferenze Ambientali Dei Salmonidi Nei Corsi D ’ Acqua Alpini. 1–15. |
| Marchetto et al. | 2010 | paper | Marchetto, F., Zaccara, S., Muenzel, F. M., and Salzburger, W. (2010). Phylogeography of the Italian vairone (Telestes muticellus, Bonaparte 1837) inferred by microsatellite markers: Evolutionary history of a freshwater fish species with a restricted and fragmented distribution. *BMC Evol. Biol.* 10, 1–12. doi:10.1186/1471-2148-10-111. |
| Marconato and Rasotto | 1989 | paper | Marconato, A., and Rasotto, M. B. (1989). The biology of a population of spined loach, Cobitis taenia l. *Bolletino di Zool.* 56, 73–80. doi:10.1080/11250008909355624. |
| Marconato et al. | 1989 | paper | Marconato, A., Bisazza, A., and Marin, G. (1989). Correlates of male reproductive success in Padogobius martensi (Gobiidae). *J. Fish Biol.* 34, 889–899. doi:10.1111/j.1095-8649.1989.tb03372.x. |
| Mastrorillo and Dauba | 1999 | paper | Mastrorillo, S., and Dauba, F. (1999). Short-term impact of reservoir cleaning on the microhabitat use of three non-salmonid fishes in a piedmont river in south west France. *Aquat. Sci.* 61, 323–336. doi:10.1007/s000270050069. |
| Mastrorillo et al. | 1996 | paper | Mastrorillo, S., Dauba, F., and Belaud, A. (1996). Microhabitat use by minnow, gudgeon and stone loach in three rivers in southwestern France. *Ann. Limnol.* 32, 185–195. doi:10.1051/limn/1996017. |
| Mastrorillo et al. | 1997 | paper | Mastrorillo, S., Lek, S., and Dauba, F. (1997). Predicting the abundance of minnow Phoxinus phoxinus (Cyprinidae) in the River Ariege (France) using artificial neural networks. *Aquat. Living Resour.* 10, 169–176. doi:10.1051/alr:1997018. |
| Mastrorillo et al. | 1997 | paper | Mastrorillo, S., Lek, S., Dauba, F., and Belaud, A. (1997). The use of artificial neural networks to predict the presence of small-bodied fish in a river. *Freshw. Biol.* 38, 237–246. doi:10.1046/j.1365-2427.1997.00209.x. |
| Mecatti et al. | 2010 | paper | Mecatti, M., Gualtieri, M., and Gattai, K. (2010). Transfaunazioni invasive nel distretto ittiofaunistico tosco-laziale: prove di competizione territoriale e alimentare tra Padogobius nigricans e Padogobius bonelli. *Stud. trentini di Sci. Nat. - Acta Biol.* 87, 133–136. |
| Miller | 1990 | paper | Miller, P. J. (1990). The endurance of endemism: the Mediterranean freshwater gobies and their prospects for survival. *J. Fish Biol.* 37, 145–156. doi:10.1111/j.1095-8649.1990.tb05030.x. |
| Mills and Mann | 1983 | paper | Mills, C. A., and Mann, R. H. K. (1983). The bullhead cottus gobio, a versatile and successful fish. *Annnual Rep. Freshw. Biol. Assoc. Ambleside, Cumbria*, 76–88. |
| Moro | 2019 | paper | Moro, G.-A. (2019). Osservazioni sull’attività riproduttiva di Salmo marmoratus in Friuli Venezia Giulia. *Ital. J. Freshw. Ichthyol.* 1, 132–146. |
| Mouton et al. | 2008 | paper | Mouton, A. M., Schneider, M., Peter, A., Holzer, G., Müller, R., Goethals, P. L. M., et al. (2008). Optimisation of a fuzzy physical habitat model for spawning European grayling (Thymallus thymallus L.) in the Aare river (Thun, Switzerland). *Ecol. Modell.* 215, 122–132. doi:10.1016/j.ecolmodel.2008.02.028. |
| Müller | 1961 | paper | Müller, K. (1961). Die Biologie der Äsche (Thymallus thymallus L.) im Lule Älv (Schwedisch Lappland). *Zeitschrift für Fischerei und deren Hilfswissenschaften Neue Folge* 10, 173–201. |
| Muñoz-Mas et al. | 2012 | paper | Muñoz-Mas, R., Martínez-Capel, F., Schneider, M., and Mouton, A. M. (2012). Assessment of brown trout habitat suitability in the Jucar River Basin (SPAIN): Comparison of data-driven approaches with fuzzy-logic models and univariate suitability curves. *Sci. Total Environ.* 440, 123–131. doi:10.1016/j.scitotenv.2012.07.074. |
| Muñoz-Mas et al. | 2016 | paper | Muñoz-Mas, R., Vezza, P., Alcaraz-Hernández, J. D., and Martínez-Capel, F. (2016). Risk of invasion predicted with support vector machines: A case study on northern pike (Esox Lucius, L.) and bleak (Alburnus alburnus, L.). *Ecol. Modell.* 342, 123–134. doi:10.1016/j.ecolmodel.2016.10.006. |
| Neat et al. | 2003 | paper | Neat, F. C., Lengkeek, W., Westerbeek, E. P., Laarhoven, B., and Videler, J. J. (2003). Behavioural and morphological differences between lake and river populations of Salaria fluviatilis. *J. Fish Biol.* 63, 374–387. doi:10.1046/j.1095-8649.2003.00159.x. |
| Neveu | 1981 | paper | Neveu, A. (1981). Densité et microrépartition des différentes espèces de poissons dans la Basse-Nivelle, petit fleuve côtier des Pyrénées Atlantiques. *Bull. Français Piscic.*, 86–102. doi:10.1051/kmae:1981021. |
| Nika and Virbickas | 2010 | paper | Nika, N., and Virbickas, T. (2010). Brown trout Salmo trutta redd superimposition by spawning Lampetra species in a lowland stream. *J. Fish Biol.* 77, 2358–2372. doi:10.1111/j.1095-8649.2010.02818.x. |
| Nilsson and Persson | 2005 | paper | Nilsson, E., and Persson, A. (2005). Do instream habitat variables and the abundance of brown trout Salmo trutta (L.) affect the distribution and growth of stone loach, Barbatula barbatula (L.)? *Ecol. Freshw. Fish* 14, 40–49. doi:10.1111/j.1600-0633.2004.00074.x. |
| Nunn et al. | 2003 | paper | Nunn, A. D., Cowx, I. G., and Harvey, J. P. (2003). Note on the ecology of spined loach in the lower River Trent, England. *Fish. Manag. Ecol.* 10, 117–121. doi:10.1046/j.1365-2400.2003.00322.x. |
| Nunn et al. | 2014 | paper | Nunn, A. D., Tewson, L. H., Bolland, J. D., Harvey, J. P., and Cowx, I. G. (2014). Temporal and spatial variations in the abundance and population structure of the spined loach (Cobitis taenia), a scarce fish species: Implications for condition assessment and conservation. *Aquat. Conserv. Mar. Freshw. Ecosyst.* 24, 818–830. doi:10.1002/aqc.2451. |
| Nykanen and Huusko | 2002 | paper | Nykanen, M., and Huusko, A. (2002). Suitability criteria for spawning habitat of riverine European grayling. *J. Fish Biol.* 60, 1351–1354. doi:10.1111/j.1095-8649.2002.tb01730.x. |
| Nykanen et al. | 2001 | paper | Nykanen, M., Huusko, A., and Maki-Petays, A. (2001). Seasonal changes in the habitat use and movements of adult European grayling in a large subarctic river. *J. Fish Biol.* 58, 506–519. doi:10.1111/j.1095-8649.2001.tb02269.x. |
| Nykänen et al. | 2004 | paper | Nykänen, M., Huusko, A., and Lahti, M. (2004). Changes in movement, range and habitat preferences of adult grayling from late summer to early winter. *J. Fish Biol.* 64, 1386–1398. doi:10.1111/j.0022-1112.2004.00403.x. |
| Nykänen et al. | 2004 | paper | Nykänen, M., Huusko, A., and Lahti, M. (2004). Movements and habitat preferences of adult grayling (Thymallus thymallus L.) from late winter to summer in a boreal river. *Arch. fur Hydrobiol.* 161, 417–432. doi:10.1127/0003-9136/2004/0161-0417. |
| Ojutkangas et al. | 1995 | paper | Ojutkangas, E., Aronen, K., and Laukkanen, E. (1995). Distribution and abundance of river Lamprey (Lampetra fluviatilis) ammocoetes in the regulated river Perhonjoki. *Regul. Rivers Res. Manag.* 10, 239–245. doi:10.1002/rrr.3450100218. |
| Ovidio and Philippart | 2003 | paper | Ovidio, M., and Philippart, J. (2003). Long range seasonal movements of northern pike (Esox lucius L .) in the barbel zone of the River Ourthe ( River Meuse basin , Belgium ). *Aquat. Telem.  Adv. Appl.*, 191–202. |
| Ovidio et al. | 2013 | paper | Ovidio, M., Seredynski, A. L., Philippart, J. C., and Nzau Matondo, B. (2013). A bit of quiet between the migrations: The resting life of the European eel during their freshwater growth phase in a small stream. *Aquat. Ecol.* 47, 291–301. doi:10.1007/s10452-013-9444-1. |
| Ovidio et al. | 2015 | paper | Ovidio, M., Tarrago-Bès, F., and Matondo, B. N. (2015). Short-term responses of glass eels transported from UK to small Belgian streams. *Ann. Limnol.* 51, 219–226. doi:10.1051/limn/2015016. |
| Pavlov et al. | 2014 | paper | Pavlov, D. S., Nazarov, D. Y., Zvezdin, A. O., and Kucheryavyi, A. V. (2014). Downstream migration of early larvae of the European river lamprey Lampetra fluviatilis. *Dokl. Biol. Sci.* 459, 344–347. doi:10.1134/S0012496614060039. |
| Pekárik et al. | 2012 | paper | Pekárik, L., Koščo, J., and Švátora, M. (2012). Reference conditions for fish microhabitat use in foothill streams: A case study on undisrupted carpathian streams. *River Res. Appl.* 28, 369–376. doi:10.1002/rra.1462. |
| Penzo et al. | 1998 | paper | Penzo, E., Gandolfi, G., Bargelloni, L., Colombo, L., and Patarnello, T. (1998). Messinian salinity crisis and the origin of freshwater lifestyle in western Mediterranean gobies. *Mol. Biol. Evol.* 15, 1472–1480. doi:10.1093/oxfordjournals.molbev.a025874. |
| Perrow and Jowitt | 1999 | report | Perrow, M. R., and Jowitt, A. J. D. (1999). The habitat and management requirements of spined loach Cobitis taenia. Peterborough (UK): Nature Conservancy Council for England. |
| Pilcher and Copp | 1997 | paper | Pilcher, M. W., and Copp, G. H. (1997). Winter distribution and habitat use by fish in a regulated lowland river system of south-east England. *Fish. Manag. Ecol.* 4, 199–215. doi:10.1046/j.1365-2400.1997.00120.x. |
| Poizat and Pont | 1996 | paper | Poizat, G., and Pont, D. (1996). Multi-scale approach to species-habitat relationships: Juvenile fish in a large river section. *Freshw. Biol.* 36, 611–622. doi:10.1046/j.1365-2427.1996.00129.x. |
| Pollux et al. | 2006 | paper | Pollux, B. J. A., Korosi, A., Verberk, W. C. E. P., Pollux, P. M. J., and Van Der Velde, G. (2006). Reproduction, growth, and migration of fishes in a regulated lowland tributary: Potential recruitment to the river Meuse. *Hydrobiologia* 565, 105–120. doi:10.1007/s10750-005-1908-4. |
| Pompei et al. | 2016 | paper | Pompei, L., Giannetto, D., and Lorenzoni, M. (2016). Reproductive parameters in native and non-native areas of Padogobius bonelli and comparison with P. nigricans (Actynopterigii, Gobiidae). *Hydrobiologia* 779, 173–182. doi:10.1007/s10750-016-2812-9. |
| Pompei et al. | 2017 | paper | Pompei, L., Carosi, A., Cauzillo, C., and Lorenzoni, M. (2017). Indagine sull’occupazione dei nidi da parte del ghiozzo padano e del ghiozzo di ruscello in alcuni affluenti del fiume Tevere. *Ital. J. Zool.*, 140–146. |
| Poncin | 1996 | paper | Poncin, P. (1996). A field observation on the influence of aggressive behaviour on mating success in the European grayling. *J. Fish Biol.* 48, 802–804. doi:10.1111/j.1095-8649.1996.tb01475.x. |
| Povz | 1995 | paper | Povz, M. (1995). Status of freshwater fishes in the Adriatic catchment of Slovenia. *Biol. Conserv.* 72, 171–177. doi:10.1016/0006-3207(94)00079-6. |
| Prenda et al. | 1997 | paper | Prenda, J., Armitage, P. D., and Grayston, A. (1997). Habitat use by the fish assemblages of two chalk streams. *J. Fish Biol.* 51, 64–79. doi:10.1111/j.1095-8649.1997.tb02514.x. |
| Przybylski et al. | 2003 | paper | Przybylski, M., Ziȩba, G., Marszał, L., and Dukowska, M. (2003). Microhabitat Preferences of Spined Loach, Cobitis Sp. in the Grabia River - Multivariation Approach. *Folia Biol. (Praha).* 51, 167–171. |
| Punchard et al. | 1997 | report | Punchard, N., Perrow, M., and Beardall, C. (1997). Habitat preferences of the bullhead ( Cottus gobio ) in some Norfolk rivers. Peterborough (UK): Environment Agency. |
| Quignard and Douchement | 1991 | book | Quignard, J. P., and Douchement, C. L. (1991). *The freshwater fishes of Europe. Volume 2: Clupeidea, Anguillidae*. Wiesbaden (DE): Aula-Verlag. |
| Quirós and Vinyoles | 2016 | paper | Quirós, C., and Vinyoles, D. (2016). Streamflow reduction induces early parental care in Salaria fluviatilis (Asso, 1801) males. *J. Appl. Ichthyol.* 32, 198–203. doi:10.1111/jai.13023. |
| Radinger et al. | 2017 | paper | Radinger, J., Kail, J., and Wolter, C. (2017). Differences among Expert Judgments of Fish Habitat Suitability and Implications for River Management. *River Res. Appl.* 33, 538–547. doi:10.1002/rra.3109. |
| Reyjol | 2012 | paper | Reyjol, Y. (2012). An analysis of microhabitat used by fish in natural and regulated sections of the river garonne (SW France). *Fundam. Appl. Limnol.* 181, 301–313. doi:10.1127/1863-9135/2012/0368. |
| Reyjol et al. | 2001 | paper | Reyjol, Y., Lim, P., Belaud, A., and Lek, S. (2001). Modelling of microhabitat used by fish in natural and regulated flows in the river Garonne (France). *Ecol. Modell.* 146, 131–142. doi:10.1016/S0304-3800(01)00301-5. |
| Riedl and Peter | 2013 | paper | Riedl, C., and Peter, A. (2013). Timing of brown trout spawning in Alpine rivers with special consideration of egg burial depth. *Ecol. Freshw. Fish* 22, 384–397. doi:10.1111/eff.12033. |
| Rifflart et al. | 2009 | paper | Rifflart, R., Carrel, G., Le Coarer, Y., and Fontez, B. N. T. (2009). Spatio-temporal patterns of fish assemblages in a large regulated alluvial river. *Freshw. Biol.* 54, 1544–1559. doi:10.1111/j.1365-2427.2009.02200.x. |
| Říha et al. | 2013 | paper | Říha, M., Hladík, M., Mrkvička, T., Prchalová, M., Čech, M., Draštík, V., et al. (2013). Post-spawning dispersal of tributary spawning fish species to a reservoir system. *Folia Zool.* 62, 1–13. doi:10.25225/fozo.v62.i1.a1.2013. |
| Riley and Pawson | 2010 | paper | Riley, W. D., and Pawson, M. G. (2010). Habitat use by Thymallus thymallus in a chalk stream and implications for habitat management. *Fish. Manag. Ecol.* 17, 544–553. doi:10.1111/j.1365-2400.2010.00756.x. |
| Riley et al. | 2006 | paper | Riley, W. D., Ives, M. J., Pawson, M. G., and Maxwell, D. L. (2006). Seasonal variation in habitat use by salmon, Salmo salar, trout, Salmo trutta and grayling, Thymallus thymallus, in a chalk stream. *Fish. Manag. Ecol.* 13, 221–236. doi:10.1111/j.1365-2400.2006.00496.x. |
| Robotham | 1978 | paper | Robotham, P. W. J. (1978). Some factors influencing the microdistribution of a population of spined loach, Cobitis taenia (L.). *Hydrobiologia* 61, 161–167. doi:10.1007/BF00018747. |
| Rooney et al. | 2013 | paper | Rooney, S. M., O’Gorman, N. M., Greene, F., and King, J. J. (2013). Aspects of brook lamprey (Lampetra planeri Bloch) spawning in Irish waters. *Biol. Environ.* 113 B, 13–25. doi:10.3318/BIOE.2013.02. |
| Roussel and Bardonnet | 1996 | paper | Roussel, J. M., and Bardonnet, A. (1996). Differences in habitat use by day and night for brown trout (Salmo truuta) and sculpin (Cottus gobio) in a natural brook: multivariate and multiscale analyses. *Cybium* 20, 45–53. |
| Roussel and Bardonnet | 1997 | paper | Roussel, J. M., and Bardonnet, A. (1997). Diel and seasonal patterns of habitat use by fish in a natural salmonid brook : an approach to the functional role of the riffle-pool sequence. *Bull. Français la Pêche la Piscic.* 346, 573–588. doi:10.1051/kmae:1997005. |
| Roussel et al. | 1998 | paper | Roussel, J. M., Bardonnet, A., Haury, J., Baglinière, J. L., and Prévost, E. (1998). Aquatic plant and fish assemblage : A macrophyte removal experiment in stream riffle habitats in a lowland salmonid river (Brittany, France). *BFPP - Bull. Fr. la Pech. la Prot. des Milieux Aquat.* 71, 693–709. doi:10.1051/kmae:1998035. |
| Ruggieri et al. | 2017 | paper | Ruggieri, L., Brenda, R., Oreglini, U., Cameli, A., Di Toro, F., and Brugnola, L. (2017). Prima segnalazione di ghiozzo padano (Padogobius bonelli Bonaparte, 1846) nel fiume Vomano. *Ital. J. Freshw. Ichthyol.*, 192–195. |
| Schiemer and Waidbacher | 1992 | paper | Schiemer, F., and Waidbacher, H. (1992). Strategies for conservation of a Danubian fish fauna. *River Conserv. Manag.*, 363–382. doi:10.1016/0006-3207(92)90983-t. |
| Schroll | 1959 | paper | Schroll, F. (1959). Zur Ernährungsbiologie der Steirischen Ammocöten Lampetra planeri (Bloch) Und Eudontomyzon Danfordi(Regan). *Int. Rev. der gesamten Hydrobiol. und Hydrogr.* 44, 395–429. doi:10.1002/iroh.19590440121. |
| Sempeski and Gaudin | 1995 | paper | Sempeski, P., and Gaudin, P. (1995). Habitat selection by grayling‐II. Preliminary results on larval and juvenile daytime habitats. *J. Fish Biol.* 47, 345–349. doi:10.1111/j.1095-8649.1995.tb01903.x. |
| Sempeski and Gaudin | 1995 | paper | Sempeski, P., and Gaudin, P. (1995). Habitat selection by grayling—I. Spawning habitats. *J. Fish Biol.* 47, 256–265. doi:10.1111/j.1095-8649.1995.tb01893.x. |
| Sempeski and Gaudin | 1995 | paper | Sempeski, P., and Gaudin, P. (1995). Établissement de courbes de préférences d’habitat pour les frayères et les jeunes stades d’ombre commun (Thymallus Thymallus, L.). *Bull. Français la Pêche la Piscic.*, 277–282. doi:10.1051/kmae:1995031. |
| Sempeski and Gaudin | 1995 | paper | Sempeski, P., and Gaudin, P. (1995). Size-related changes in diel distribution of young grayling (Thymallus thymallus). *Can. J. Fish. Aquat. Sci.* 52, 1842–1848. doi:10.1139/f95-177. |
| Silva et al. | 2015 | paper | Silva, S., Gooderham, A., Forty, M., Morland, B., and Lucas, M. C. (2015). Egg drift and hatching success in European river lamprey Lampetra fluviatilis: Is egg deposition in gravel vital to spawning success? *Aquat. Conserv. Mar. Freshw. Ecosyst.* 25, 534–543. doi:10.1002/aqc.2486. |
| Simonović et al. | 1999 | paper | Simonović, P. D., Garner, P., Eastwood, E. A., Kováč, V., and Copp, G. H. (1999). Correspondence between ontogenetic shifts in morphology and habitat use in minnow Phoxinus phoxinus. *Environ. Biol. Fishes* 56, 117–128. doi:10.1023/a:1007541915307. |
| Slavík et al. | 2000 | paper | Slavík, O., Mattas, D., Jiřinec, P., Bartoš, L., and Rebec, J. (2000). Substratum selection by different sizes of spined loach Cobitis sp. *Folia Zool.* 49, 167–172. |
| Smith | 2013 | PhD thesis | Smith, M. A. (2013). Outcomes of river rehabilitation on instream hydraulics and fish communities. |
| Smyly | 1955 | paper | Smyly, W. J. P. (1955). On the Biology of the Stone-Loach Nemacheilus barbatula (L.). *J. Anim. Ecol.* 24, 167. doi:10.2307/1884. |
| Smyly | 1957 | paper | Smyly, W. J. P. (1957). The life‐history of the bullhead or miller’s thumb (Cottus gobio L.). in *Proceedings of the Zoological Society of London* (John Wiley & Sons, Ltd), 431–454. doi:10.1111/j.1096-3642.1957.tb00336.x. |
| Stoch and Genovesi | 2016 | report | Stoch, F., and Genovesi, P. (2016). Manuali per il monitoraggio di specie e habitat di interesse comunitario (Direttiva 92/43/CEE) in Italia: specie animali. Roma (IT): ISPRA, Serie Manuali e linee guida, 141/2016. |
| Šumer et al. | 2001 | paper | Šumer, S., Leiner, S., and Povz, M. (2001). Marble trout (Salmo marmoratus) and bullhead (Cottus Gobio) in two slovene rivers (Adriatic Sea basin). *Ann. Ser. Hist. Nat.* 11, 29–34. |
| Taverny et al. | 2012 | paper | Taverny, C., Lassalle, G., Ortusi, I., Roqueplo, C., Lepage, M., and Lambert, P. (2012). From shallow to deep waters: Habitats used by larval lampreys (genus Petromyzon and Lampetra) over a western European basin. *Ecol. Freshw. Fish* 21, 87–99. doi:10.1111/j.1600-0633.2011.00526.x. |
| Telcean and Cupùa | 2009 | paper | Telcean, I. C., and Cupùa, D. (2009). Distribution of the species telestes souffia (Risso, 1827) (Pisces: Cyprinidae) in the upper Tisa river and its tributaries (Maramureù County-North Romania). *Oltenia. Stud. si Comun. Stiint. Nat.*, 161–164. |
| Tirelli and Pessani | 2009 | paper | Tirelli, T., and Pessani, D. (2009). Use of decision tree and artificial neural network approaches to model presence/absence of telestes muticellus in Piedmont (North-Western Italy). *River Res. Appl.* 25, 1001–1012. doi:10.1002/rra.1199. |
| Tirelli and Pessani | 2011 | paper | Tirelli, T., and Pessani, D. (2011). Importance of feature selection in decision-tree and artificial-neural-network ecological applications. Alburnus alburnus alborella: A practical example. *Ecol. Inform.* 6, 309–315. doi:10.1016/j.ecoinf.2010.11.001. |
| Tirelli et al. | 2009 | paper | Tirelli, T., Pozzi, L., and Pessani, D. (2009). Use of different approaches to model presence/absence of Salmo marmoratus in Piedmont (Northwestern Italy). *Ecol. Inform.* 4, 234–242. doi:10.1016/j.ecoinf.2009.07.003. |
| Tomlinson and Perrow | 2003 | report | Tomlinson, M. L., and Perrow, M. R. (2003). Ecology of the Bullhead. Peterborough (UK): Environment Agency. |
| Tutman et al. | 2009 | paper | Tutman, P., Dulčić, J., and Glamuzina, B. (2009). First record of Po brook lamprey, Lethenteron zanandreai (Cephalaapidomorphi: Petromyzontiformes: Petromyzontidae), in the Hutovo Blato wetland, Bosnia and Herzegovina. *Acta Ichthyol. Piscat.* 39, 55–58. |
| Van Liefferinge et al. | 2005 | paper | Van Liefferinge, C., Seeuws, P., Meire, P., and Verheyen, R. F. (2005). Microhabitat use and preferences of the endangered Cottus gobio in the River Voer, Belgium. *J. Fish Biol.* 67, 897–909. doi:10.1111/j.0022-1112.2005.00782.x. |
| Vehanen et al. | 2003 | paper | Vehanen, T., Huusko, A., Yrjänä, T., Lahti, M., and Mäki-Petäys, A. (2003). Habitat preference by grayling (Thymallus thymallus) in an artificially modified, hydropeaking riverbed: A contribution to understand the effectiveness of habitat enhancement measures. *J. Appl. Ichthyol.* 19, 15–20. doi:10.1046/j.1439-0426.2003.00354.x. |
| Vezza et al. | 2012 | paper | Vezza, P., Parasiewicz, P., Rosso, M., and Comoglio, C. (2012). Defining minimum environmental flows at regional scale: Application of mesoscale habitat models and catchments classification. *River Res. Appl.* 28, 717–730. doi:10.1002/rra.1571. |
| Vezza et al. | 2012 | paper | Vezza, P., Parasiewicz, P., Spairani, M., and Comoglio, C. (2012). Meso-scale habitat modelling in Alpine high gradient streams. in *Proceeding of the 9th Eco-hydraulics Symposium ISE*. |
| Vezza et al. | 2014 | paper | Vezza, P., Parasiewicz, P., Calles, O., Spairani, M., and Comoglio, C. (2014). Modelling habitat requirements of bullhead (Cottus gobio) in Alpine streams. *Aquat. Sci.* 76, 1–15. doi:10.1007/s00027-013-0306-7. |
| Vinyoles and De Sostoa | 2007 | paper | Vinyoles, D., and De Sostoa, A. (2007). Life-history traits of the endangered river blenny Salaria fluviatilis (Asso) and their implications for conservation. *J. Fish Biol.* 70, 1088–1108. doi:10.1111/j.1095-8649.2007.01371.x. |
| Vinyoles Cartanyà | 1993 | PhD thesis | Vinyoles Cartanyà, D. (1993). Biologia i ecologia de “Blennius fluviatilis” (Pisces: blenniidae) al riu Matarranya. |
| Vismara et al. | 2001 | paper | Vismara, R., Azzellino, A., Bosi, R., Crosa, G., and Gentili, G. (2001). Habitat suitability curves for brown trout (Salmo trutta fario L.) in the River Adda, Northern Italy: Comparing univariate and multivariate approaches. *River Res. Appl.* 17, 37–50. doi:10.1002/1099-1646(200101/02)17:1<37::aid-rrr606>3.0.co;2-q. |
| Vitali and Braghieri | 1984 | paper | Vitali, R., and Braghieri, L. (1984). Population dynamics of Barbus barbus plebejus (Valenciennes) and Leuciscus cephalus cabeda (Risso) in the middle River Po (Italy). *Hydrobiologia* 109, 105–124. doi:10.1007/BF00011570. |
| Vlach et al. | 2005 | paper | Vlach, P., Dusek, J., Svátora, M., and Moravec, P. (2005). Fish assemblage structure, habitat and microhabitat preference of five fish species in a small stream. *Folia Zool.* 54, 421. |
| Vriese et al. | 1994 | paper | Vriese, F. T., Semmekrot, S., and Raat, A. J. P. (1994). Assessment of spawning and nursery areas in the River Meuse. *Water Sci. Technol.* 29, 297–299. doi:10.2166/wst.1994.0124. |
| Vv.Aa. | 2001 | paper | Vv.Aa. (2001). Ecologia e gestione del temolo (Thymallus thymallus): Esperienze italiane e europee a confronto. in *Atti del Convegno, 14 ottobre 2000, Parco del Ticino, Pontevecchio di Magenta (MI)* (Pontevecchio di Magenta (IT)), 205. |
| Waterstraat and Krappe | 1998 | paper | Waterstraat, A., and Krappe, M. (1998). Distribution and abundance of lampetra planen populations in the peene drainage (NE Germany) in relation to isolation and habitat conditions. *Ital. J. Zool.* 65, 137–143. doi:10.1080/11250009809386805. |
| Watkins et al. | 1997 | paper | Watkins, M. S., Doherty, S., and Copp, G. H. (1997). Microhabitat use by 0+ and older fishes in a small English chalk stream. *J. Fish Biol.* 50, 1010–1024. doi:10.1111/j.1095-8649.1997.tb01626.x. |
| Welton et al. | 1983 | paper | Welton, J. S., Mills, C. A., and Rendle, E. L. (1983). Food and habitat partitioning in two small benthic fishes, Noemacheilus barbatulus (L.) and Cottus gobio L. *Arch. für Hydrobiol.*, 434–454. |
| Wocher and Rösch | 2006 | paper | Wocher, H., and Rösch, R. (2006). Migrations of soufie (Leuciscus souffia agassizii, VAL. 1844) in a natural river and a tributary determined by mark-recapture. *Arch. fur Hydrobiol.* 165, 77–87. doi:10.1127/0003-9136/2006/0165-0077. |
| Wolter et al. | 2013 | report | Wolter, C., Lorenz, S., Scheunig, S., Lehmann, N., and Schomaker, C. (2013). REstoring rivers FOR effective catchment Management. Review on ecological response to hydromorphological degradation and restoration D1.3. |
| Worischka et al. | 2014 | paper | Worischka, S., Hellmann, C., Berendonk, T. U., and Winkelmann, C. (2014). Fish predation can induce mesohabitat-specific differences in food web structures in small stream ecosystems. *Aquat. Ecol.* 48, 367–378. doi:10.1007/s10452-014-9490-3. |
| Zarkami et al. | 2010 | paper | Zarkami, R., Goethals, P., and Pauw, N. De (2010). Use of classification tree methods to study the habitat requirements of tench (Tinca. 8, 55–63. |
| Zeh and Ortlepp | 1996 | book section | Zeh, M., and Ortlepp, J. (1996). “Spawning grounds of Chondrostoma soetta Bonaparte, 1840 (Cyprinidae) in Southern Switzerland,” in *Conservation of Endangered Freshwater Fish in Europe*, eds. A. Kirchhofer and D. Hefti (Basel (CH): Birkhäuser), 299–304. doi:10.1007/978-3-0348-9014-4_29. |
| Zerunian | 2004 | book | Zerunian, S. (2004). *Pesci delle acque interne d’Italia*. , ed. Ministero dell’ambiente e della tutela del territorio. Direzione conservazione della natura Roma (IT): Ministero dell’ambiente e della tutela del territorio. Direzione conservazione della natura. |
| Zweimüller | 1995 | paper | Zweimüller, I. (1995). Microhabitat use by two small benthic stream fish in a 2nd order stream. *Hydrobiologia* 303, 125–137. doi:10.1007/BF00034050. |

# References

Belletti, B., Rinaldi, M., Bussettini, M., Comiti, F., Gurnell, A. M., Mao, L., et al. (2017). Characterising physical habitats and fluvial hydromorphology: A new system for the survey and classification of river geomorphic units. *Geomorphology* 283, 143–157. doi:10.1016/j.geomorph.2017.01.032.

Gurnell, M., Bussettini, M., Camenen, B., González Del Tánago, M., Grabowski, R., Hendriks, D., et al. (2014). REstoring rivers FOR effective catchment Management (REFORM). Deliverable D2.1 Part I. A hierarchical multi-scale framework and indicators of hydromorphological processes and forms. Available at: http://www.reformrivers.eu/system/files/D2.1 Part 1 Main Report FINAL.pdf [Accessed February 17, 2021].

Meador, M. R., McIntyre, J. P., and Pollock, K. H. (2003). Assessing the Efficacy of Single-Pass Backpack Electrofishing to Characterize Fish Community Structure. *Trans. Am. Fish. Soc.* 132, 39–46. doi:10.1577/1548-8659(2003)132<0039:ateosp>2.0.co;2.

Vezza, P., Parasiewicz, P., Rosso, M., and Comoglio, C. (2012). Defining minimum environmental flows at regional scale: Application of mesoscale habitat models and catchments classification. *River Res. Appl.* 28, 717–730. doi:10.1002/rra.1571.

Vezza, P., Parasiewicz, P., Calles, O., Spairani, M., and Comoglio, C. (2014a). Modelling habitat requirements of bullhead (Cottus gobio) in Alpine streams. *Aquat. Sci.* 76, 1–15. doi:10.1007/s00027-013-0306-7.

Vezza, P., Parasiewicz, P., Spairani, M., and Comoglio, C. (2014b). Habitat modeling in high-gradient streams: The mesoscale approach and application. *Ecol. Appl.* 24, 844–861. doi:10.1890/11-2066.1.

Vezza, P., Zanin, A., and Parasiewicz, P. (2017). Manuale tecnico-operativo per la modellazione e la valutazione dell’integrità dell’habitat fluviale. Roma (IT).
